# Supplementary material for: Enhanced hydrogen separation by vertically-aligned carbon nanotube membranes with zeolite imidazolate frameworks as a selective layer
Source: Royal Society of Chemistry journal article supplement (doi:10.1039/c2ra21460a), 2012-01-01
Supplement: c2ra21460a.pdf [file c2ra21460a.pdf]

## Supplementary Information

### Enhanced hydrogen separation performance of vertically-aligned carbon nanotube membrane with zeolite imidazolate frameworks surface modification

Lei Ge,<sup>a</sup> Aijun Du,<sup>b</sup> Meng Hou,<sup>c</sup> Victor Rudolph<sup>a</sup> and Zhonghua Zhu<sup>a\*</sup>

Table S1. Detailed results of Rietveld refinement of ZIF-8

| Site | Np | x       | y       | z       | Atom | Occ | Beg    |
|------|----|---------|---------|---------|------|-----|--------|
| Zn   | 12 | 0.50000 | 0.00000 | 0.75000 | Zn+2 | 1   | 4.531  |
| N    | 48 | 0.41082 | 0.96641 | 0.68191 | N    | 1   | 1.466  |
| C1   | 24 | 0.37670 | 0.00560 | 0.62330 | C    | 1   | 0.5365 |
| C2   | 48 | 0.37010 | 0.89460 | 0.68710 | C    | 1   | 3.987  |
| C3   | 24 | 0.40500 | 0.08600 | 0.59500 | C    | 1   | -1.751 |
| H1   | 48 | 0.38290 | 0.85310 | 0.72940 | H    | 1   | 20     |
| H2   | 48 | 0.56940 | 0.11960 | 0.36190 | H    | 1   | 20     |
| H3   | 24 | 0.55230 | 0.08070 | 0.44770 | H    | 1   | 20     |

|                                         |                 |
|-----------------------------------------|-----------------|
| Phase name                              | Structure       |
| R-Bragg                                 | 3.702           |
| Spacegroup                              | I-43m           |
| Scale                                   | 2.02151844e-006 |
| Cell Mass                               | 2731.009        |
| Cell Volume (Å <sup>3</sup> )           | 4929.11601      |
| Wt% - Rietveld                          | 100.000         |
| Crystallite Size                        |                 |
| Cry size Lorentzian (nm)                | 93.6            |
| Strain                                  |                 |
| Strain L                                | 0.00644345      |
| Crystal Linear Absorption Coeff. (1/cm) | 18.815          |
| Crystal Density (g/cm <sup>3</sup> )    | 0.920           |
| Lattice parameters                      |                 |
| a (Å)                                   | 17.0185680      |

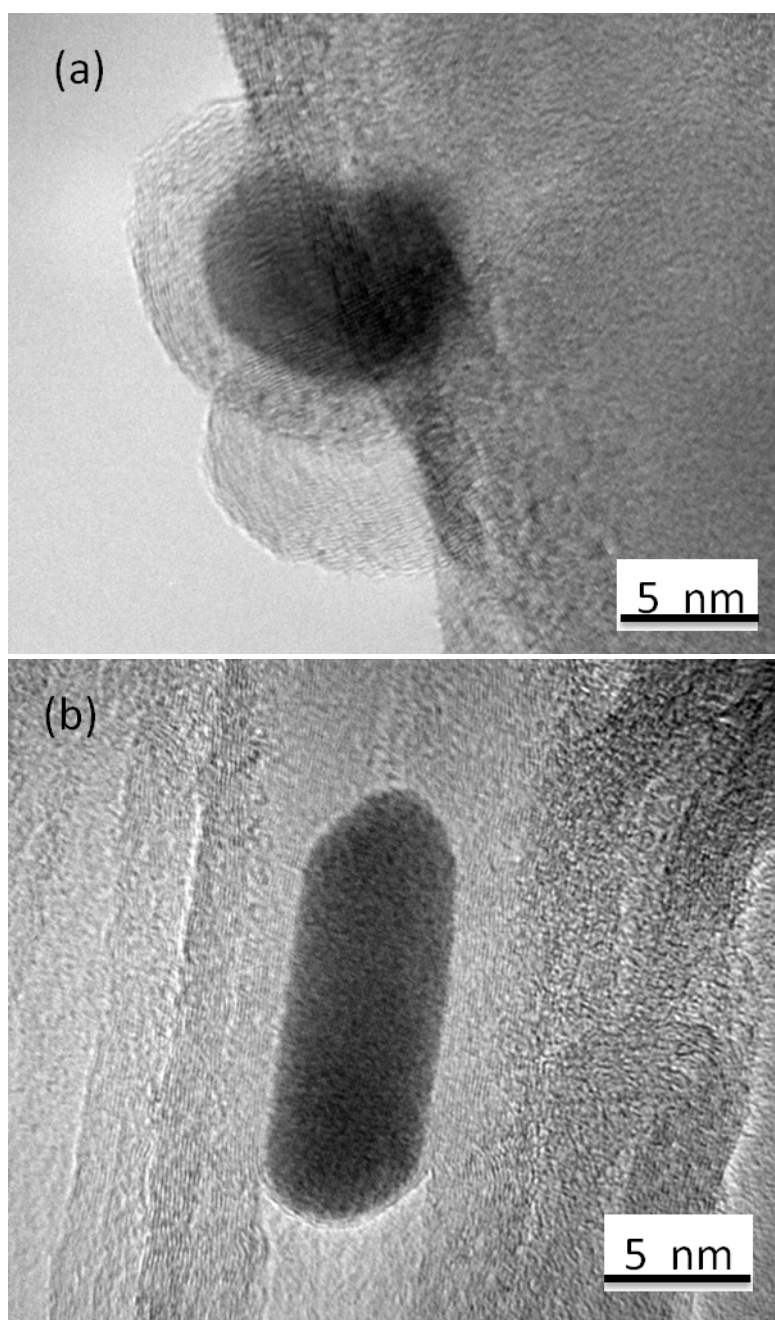

**Fig.S1** (a) Typical HRTEM image for (a) iron catalyst on the surface of CNTs and (b) iron catalyst migrated into the channel
